# Supplementary material
Source: PubMed Central journal article supplement (PMC5454508)
Supplement: 10.1194_M074302_jlr.M074302-1.pdf [file 10.1194_M074302_jlr.M074302-1.pdf]

## SUPPLEMENTAL INFORMATION

### **Identification and characterization of a novel PPAR $\alpha$ -regulated and 7 $\alpha$ -hydroxyl bile acid-preferring cytosolic sulfotransferase mL-STL (Sult2a8)**

**Lu Feng,<sup>1,\*</sup> Yee-Lok Yuen,<sup>1,\*</sup> Jian Xu,<sup>1,\*</sup> Xing Liu,<sup>\*</sup> Martin Yan-Chun Chan,<sup>\*</sup> Kai Wang,<sup>\*</sup> Wing-Ping Fong,<sup>\*</sup> Wing-Tai Cheung,<sup>2,§</sup> and Susanna Sau-Tuen Lee<sup>2,\*</sup>**

School of Life Sciences, Faculty of Science,<sup>\*</sup> and School of Biomedical Sciences, Faculty of Medicine,<sup>§</sup>  
The Chinese University of Hong Kong, Shatin, New Territories, Hong Kong SAR

<sup>1</sup>These authors contributed equally to the work.

<sup>2</sup>Co-corresponding authors

#### **To whom correspondence should be addressed**

Susanna Sau-Tuen Lee, PhD  
School of Life Sciences,  
Faculty of Science,  
The Chinese University of Hong Kong,  
Shatin, New Territories,  
Hong Kong SAR  
Phone: (852) 3943-6333  
Fax number: (852) 2603-5646  
E-mail: [lee2022@cuhk.edu.hk](mailto:lee2022@cuhk.edu.hk)

Wing-Tai Cheung, PhD  
School of Biomedical Sciences,  
Faculty of Medicine,  
The Chinese University of Hong Kong,  
Shatin, New Territories,  
Hong Kong SAR  
Phone: (852) 3943-6104  
E-mail: [wtcheung@cuhk.edu.hk](mailto:wtcheung@cuhk.edu.hk)

**Running title:** PPAR $\alpha$  regulates bile acid sulfonation during fasting

## SUPPLEMENTARY METHODS

### Mass spectrometry analysis

The column-purified recombinant His-mL-STL and preparative SDS-PAGE gel semi-purified recombinant mL-STL proteins were confirmed by mass spectrometry analysis. The proteins were first resolved in a 14% SDS-PAGE gel and stained with Coomassie blue R for 1 h. After the gel was destained, the bands corresponding to the His-mL-STL and mL-STL proteins were excised and punched into small discs using a Monoject 202 blunt-end needle (Covidien, Mansfield, MA; Cat. No. 8881-202314). The gel discs were equilibrated with 25 mM  $\text{NH}_4\text{HCO}_3$  for 1 h with vortexing at room temperature. They were then dehydrated and destained by three consecutive washes each with 50% acetonitrile (ACN)/25 mM ammonium bicarbonate ( $\text{NH}_4\text{HCO}_3$ ) for 10 min followed by a final wash with 100% ACN for 10 min. The gel was dried completely by a CentriVap vacuum concentrator (Labconco, Kansas City, MO) and then the proteins in the gel discs were reduced by 10 mM DTT/25 mM  $\text{NH}_4\text{HCO}_3$  at 60°C for 30 min. After that the proteins were alkylated in 55 mM iodoacetamide/25 mM  $\text{NH}_4\text{HCO}_3$  for 30 min in dark and the gel discs were then washed, dehydrated, dried, and digested with 400 ng trypsin/20  $\mu\text{l}$  of 25 mM  $\text{NH}_4\text{HCO}_3$  (Promega, Madison, WI; Cat. No. V5111) at 37°C overnight. The digested peptides were extracted with 25 mM  $\text{NH}_4\text{HCO}_3$ , 5% trifluoroacetic acid (TFA)/50% ACN followed by 100% ACN for 10 min in a Tru-sweep<sup>TM</sup> ultrasonic cleaner (Crest, Trenton, NJ). The extracted peptides were dried using a speed vacuum and resuspended in 10  $\mu\text{l}$  of 0.1% TFA. The peptide solution was purified with a ZipTip C<sub>18</sub> column (Millipore, Billerica) pre-wetted with 50% ACN/0.1% TFA and equilibrated with 0.1% TFA. The peptides were then loaded onto the pre-washed ZipTip C<sub>18</sub> column and it was washed with 0.1% TFA. Finally, the purified peptides were eluted in 3  $\mu\text{l}$  of 50% ACN/0.1% TFA and stored frozen at -80°C. Each peptide sample (0.5  $\mu\text{l}$ ) was spotted on a MALDI plate and was allowed to air dry. The sample spot was covered with 0.5  $\mu\text{l}$  of 10 mg/ml matrix ( $\alpha$ -cyano-4-hydroxy-cinnamic acid) and the sample was analyzed by an Applied Biosystems 4700 proteomics analyzer. The peptide

mass fingerprint spectrum of each peptide spot was generated automatically by plotting the % intensity of positively charged ions against mass-to-charge ( $m/z$ ) ratio of the ions in the range of 500 - 4000. Peptide analysis was performed using data-dependent acquisition of one MS scan followed by MS/MS scans of the ten most abundant ions in each MS scan (1). Data from peptide mass fingerprinting was processed by the Mascot software using the GPS Explorer<sup>TM</sup> Workstation. The database searching was performed using the NCBI non-redundant database with no missed cleavage allowed and peptide tolerance of 100 ppm and MS/MS tolerance of 0.5 Da (2).

## SUPPLEMENTARY REFERENCES

1. Tong, W. Y., Y. M. Liang, V. Tam, H. K. Yip, Y. T. Kao, K. M. Cheung, K. W. Yeung, and Y. W. Lam. 2010. Biochemical characterization of the cell-biomaterial interface by quantitative proteomics. *Mol. Cell. Proteomics*. **9**: 2089-2098.
2. Poetsch, A., D. Schlusener, C. Florizone, L. Eltis, C. Menzel, M. Rogner, K. Steinert, and U. Roth. 2008. Improved identification of membrane proteins by MALDI-TOF MS/MS using vacuum sublimated matrix spots on an ultraphobic chip surface. *J. Biomol. Tech.* **19**: 129-138.

Supplementary Table S1. Primers used in this study

| Name                   | Sequences (5' - 3')                                | Application                                              |
|------------------------|----------------------------------------------------|----------------------------------------------------------|
| AP8                    | ACGACTCACTATAGGGCTTTTTTTTTTTTAA                    | FDD                                                      |
| ARP1                   | ACAATTCACACAGGACGACTCCAAG                          |                                                          |
| 5'-RACE primer R       | TGGTGCATTTGTGGAAGTCTAAGAA                          | 5'-RACE (5'/3' RACE)                                     |
| 5'-RACE primer I       | CTGAGGCCAATCTGATTAGCTCTGT                          | 5'-RACE (GeneRacer)                                      |
| 3'-RACE primer S       | AAATGCACCATGATGGCTCCACCCATA                        | 3'-RACE (GeneRacer)                                      |
| M13 reverse            | GTCATAGCTGTTTCCTG                                  | Sequencing of 5' - and<br>3'-RACE clones                 |
| M13 forward            | CTGGCCGTCGTTTTAC                                   |                                                          |
| mL-STL-SEQ110          | CAATGAGGCAGAAACT                                   |                                                          |
| mL-STL-SEQ380          | ATTGTCTGCTTGATTCTG                                 |                                                          |
| mL-STL-SEQ638          | CAGGGAAAGGAACAAGTG                                 |                                                          |
| mL-STL-SEQ898          | AAGGATGATATCTCAGTC                                 |                                                          |
| mL-STL-SEQ6            | CTTGGACCACTTCTGTAC                                 |                                                          |
| mL-STL-SEQ7            | CAAGCCATGAAGCAGTAG                                 |                                                          |
| mL-STL-FP278-Pst I     | <i>aaaactgcagc</i> ATGACAGATGAATTTCTGTGGA<br>Pst I | Cloning of<br>His-mL-STL-mpRSETA<br>expression vector    |
| mL-STL-RP1319-Hind III | <i>cccaagctt</i> GTGCCAGGATTGAACTCAGA<br>Hind III  |                                                          |
| mL-STL-SEQ-FP379       | GCCAATGAGCGCACACCA                                 | Sequencing of<br>His-mL-STL-mpRSETA<br>expression vector |
| mL-STL-SEQ-RP658       | GCCACATGCATGTTTCGAA                                |                                                          |
| mL-STL-SEQ-RP1231      | GCTTCCTTTCGGGCTTTG                                 |                                                          |
| mL-STL-SEQ-FP3895(-26) | GCGCGTTGGCCGATTCAT                                 |                                                          |
| mL-STL-FP278-Nde I     | <i>gggaattccat</i> ATGACAGATGAATTTCTGTGGA<br>Nde I | Cloning of<br>mL-STL-mmpRSET<br>expression vector        |
| mL-STL-RP1319-Hind III | <i>cccaagctt</i> GTGCCAGGATTGAACTCAGA<br>Hind III  |                                                          |
| T7                     | TAATACGACTCACTATAGGG                               | Sequencing of<br>mL-STL-mmpRSET<br>expression vector     |
| mL-STL-SEQ-380         | ATTGTCTGCTTGATTCTG                                 |                                                          |
| mL-STL-SEQ-638         | CAGGGAAAGGAACAAGTG                                 |                                                          |
| mL-STL-SEQ-898         | AAGGATGATATCTCAGTC                                 |                                                          |
| mL-STL-SEQ5            | GTATTGTGCTAGAGAAGT                                 |                                                          |
| mL-STL-FP19            | ACAGATTCTCCCGACCTTA                                | Northern blot analysis                                   |
| mL-STL-RP1884          | CTGAGGCCAATCTGATTAGC                               |                                                          |

The flanking regions of the restriction enzyme sites are in lower cases and in italics.

**A****ARP1**

```

ACAATTTAC ACAGGACGAC TCCAAGGATA AAGAATCTTG TTAACGACCA TGAGGATCTG AGTTCATCC TGGCACCAAC 80
ATAGTTGAAG GAAAGAAGTA GTTCCTGAAA TTATTCCTAG ACTTCCACAA ATGCACCATG ATGGCTCCAC CCATAAAATT 160
TCGTGAATTA AAATATTTCT TGATGTCAAA TCCTTAAATA ATGAAATAAT TATACAAATT TGATTTCTGA GTGTTTCAGA 240
CATTTTAAAG AAAAGTAAA TTCAGAAAACA ATCATAACTC TGCTCTTGA CCACTTCTGT ACACCTCTAT GTCTGGCCCT 320
GTGGGTCACA GGTGACTTTC AAATCTTAGT AAGGATTTTC CTAAATATG ACCAGCTGTT GAAAATCCAG GTCATGAGCC 400
TACTCAGTTT TTATGGTTCT CTACTIONTATG AAGTAGAAAT TTGTACAGTT TGATAAGAAA GAGATTCAGC TGTTTTGTAT 480
GTTTCTTAAC TTCTCCACC CCTTTCCAGG GAAGCTTCAT GCCTGGACAA GCCATGAAGC AGTAGAGTGC TCCTCATAAC 560
TTTGAAGTAG AAAAGATGCC TGCCTGTTTG TGTAACAGCC TGGGGAAGAT TCCAATACAG AGCTAATCAG ATTGGCCTCA 640
GAAAAAATAC TAACTTATTC GTTTTGTTC TGCTTTTCAG TGTAGAAGAC TTCTGTATT TTTAAAATAC AATTTTATT 720
CTTTCACGA ATTTAAAAA AACACCTTG GAACAACAAG AACAACAAA GTATAATTAC TTCTTCTATT GCTTGCATTG 800
AAGAAATGCT TTAAAGTATC ATCATATTTA ATATTTCTCC ATCATTTTAC TTATAATCAA TAATGTCCGT AAACAAAAAT 880
TAAAAAATAA AAAGCCCTAT AGTGAGTCGT 910

```

**AP8****B**

ref|NM\_175250.5| *Mus musculus* RIKEN cDNA 2810007J24 gene (2810007J24Rik), transcript variant 1, mRNA

Length: 2147

Identities = 874/875 (99%)

```

mL-STL 18 GACTCCAAGGATAAAGAATCTTGTTAACGACCATGAGGATCTGAGTTCAATCCTGGCACC 77
Riken 1261 GACTCCAAGGATAAAGAATCTTGTTAACGACCATGAGGATCTGAGTTCAATCCTGGCACC 1320
mL-STL 78 AACATAGTTGAAGGAAAGAAGTAGTTCTGAAATTATTCTTAGACTTCCACAAATGCACC 137
Riken 1321 AACATAGTTGAAGGAAAGAAGTAGTTCTGAAATTATTCTTAGACTTCCACAAATGCACC 1380
mL-STL 138 ATGATGGCTCCACCATAAAATTTCTGTAATTTAAATATTTCTTGATGTCAAATCCTTAA 197
Riken 1381 ATGATGGCTCCACCATAAAATTTCTGTAATTTAAATATTTCTTGATGTCAAATCCTTAA 1440
mL-STL 198 ATAATGAAATAAATTATACAAATTTGATTTCTGAGTGTTCAGACATTTTAAAGAAAAGTA 257
Riken 1441 ATAATGAAATAAATTATACAAATTTGATTTCTGAGTGTTCAGACATTTTAAAGAAAAGTA 1500
mL-STL 258 AAATTCAGAAAACAATCATAACTCTGCTCTTGGACCACTTCTGTACACCTCTATGTCTGGC 317
Riken 1501 AAATTCAGAAAACAATCATAACTCTGCTCTTGGACCACTTCTGTACACCTCTATGTCTGGC 1560
mL-STL 318 CCTGTGGGTACAGGTGACTTTCAAATCTTAGTAAGGATTTTCTAAAATATGACCAGCT 377
Riken 1561 CCTGTGGGTACAGGTGACTTTCAAATCTTAGTAAGGATTTTCTAAAATATGACCAGCT 1620
mL-STL 378 GTTGAAAATCCAGGTCATGAGCCTACTCAGTTTTTATGGTTCTCTACTTATGGAAGTAGA 437
Riken 1621 GTTGAAAATCCAGGTCATGAGCCTACTCAGTTTTTATGGTTCTCTACTTATGGAAGTAGA 1680
mL-STL 438 AATTTGTACAGTTTGATAAGAAAGAGATTACAGCTGTTTTGATGTTTCTTAACTTCTCCC 497
Riken 1681 AATTTGTACAGTTTGATAAGAAAGAGATTACAGCTGTTTTGATGTTTCTTAACTTCTCCC 1740
mL-STL 498 ACCCCTTTCCAGGGAAGCTTCATGCCTGGACAAGCCATGAAGCAGTAGAGTGCTCCTCAT 557
Riken 1741 ACCCCTTTCCAGGGAAGCTTCATGCCTGGACAAGCCATGAAGCAGTAGAGTGCTCCTCAT 1800
mL-STL 558 ACCTTTGAAGTAGAAAAGATGCCTGCCTGTTTGTGTAACAGGCTGGGGAAGATTCCAATA 617
Riken 1801 ACCTTTGAAGTAGAAAAGATGCCTGCCTGTTTGTGTAACAGGCTGGGGAAGATTCCAATA 1860
mL-STL 618 CAGAGCTAATCAGATTGGCCTCAGAAAAAATACTAACTTATTTCGTTTTGTTCTGTCTTT 677
Riken 1861 CAGAGCTAATCAGATTGGCCTCAGAAAAAATACTAACTTATTTCGTTTTGTTCTGTCTTT 1920
mL-STL 678 CAGTGTAGAAGACTTCTGTATTTTTTAAAAATACAATTTTATTTCTTTCAACGAATTTTAA 736
Riken 1921 CAGTGTAGAAGACTTCTGTATTTTTTAAAAATACAATTTTATTTCTTTCAACGAATTTAAA 1980
mL-STL 737 AAAAAACACCTTTGGAACAACAAGACAACAAAAGTATAATTACTTCTTCTATTGCTTGC 796
Riken 1981 AAAAAACACCTTTGGAACAACAAGACAACAAAAGTATAATTACTTCTTCTATTGCTTGC 2040
mL-STL 797 ATTGAAGAAATGCTTTAAAGTATCATCATATTTAATATTTCTCCATCATTTCACTTATAA 856
Riken 2041 ATTGAAGAAATGCTTTAAAGTATCATCATATTTAATATTTCTCCATCATTTCACTTATAA 2100
mL-STL 857 TCAATAATGTCGGTAAACAAAAATTAATAAAAAAAAAA 891
Riken 2101 TCAATAATGTCGGTAAACAAAAATTAATAAAAAAAAAA 2135

```

**Supplementary Figure S1**

**Supplementary Figure S1. DNA sequence of a 910 bp mL-STL FDD fragment and its alignment to 2810007J24Rik cDNA sequence.** (A) DNA sequence of the partial mL-STL cDNA fragment isolated from the fluorescent differential display (FDD) analysis. The sequences of ARP1 and AP8 primers are underlined and bolded. (B) Alignment of the partial mL-STL cDNA sequence with the 3'-end of Riken cDNA 2810007J24. The mL-STL cDNA sequence from nucleotides 18 to 891 showed 99% similarity to the 3'-end of Riken cDNA sequence from nucleotides 1261 to 2135. An extra A nucleotide (boxed) was found in Riken cDNA sequence compared with the mL-STL.

**A**

**ARP1** ← 5'-RACE primer R  
ACRATTTCCAC ACAGGACGAC TCCAAGGATA AAGAATCTTG TTAACGACCA TGAGGATCTG AGTTCAATCC TGGCACCAAC ATAGTTGAAG GAAAGAAGTA GTTCCTGAAA TTTCTCTAG 120

3'-RACE primer S →  
ACTTCCACA ATGCACCTG ATGGCTCCAC CCATA AAATT TCTGTAATTA AAATATTTCT TGATGTCAA TOCTTAAATA ATGAAATAAT TATACAAATT TGATTCTGA GTGTTTCAGA 240  
 CATTTTAAAG AAAAGTAAAA TTCAGAAACA ATCATAACTC TGCTCTGGA CCACTTCTGT ACACCTCTAT GCTCGCCCT GTGGGTCACA GGTGACTTTC AAATCTTAGT AAGGATTTTC 360  
 CTAAATATG ACCAGCTGTT GAAATCCAG GCATGAGCC TACTCAGTTT TTATGGTTCT CTACTTATGG AAGTAGAAAT TTGTACAGTT TGATAAGAAA GAGATTCAGC TGTTTTGAT 480  
 GTTCTTAAAC TTCTCCACC CCTTCCAGG GAAGCTTCAT GCCTGGACAA GCCATGAAGC AGTAGAGTGC TCCTCATACC TTTGAAGTAG AAAAGATGCC TGCCTGTTTG TGTAACAGGC 600

← 5'-RACE primer I  
 TGGGAAGAT TCCAAATCAG AGCTAATCAG ATTGGCCTCA GAAAAATAC TAACCTATTC GTTTGTTC TGCTTTCAG TGTAGAAGAC TTCTGTATTT TTTAAAATAC AATTTATTT 720  
 CTTTCACGA ATTTAAAAA AACACCTTG GAACAACAAG AACACAAA GTATAATTAC TTCTTCTATT GCTTCATTG AAGAAATGCT TAAAGTATC ATCATATTTA ATATTTCTCC 840

**AP8**  
ATCATTTCAC TTATAATCAA TAATGTCGGT AAACAAAAAT TAAAAAAA AAAGCCCTAT AGTGAGTCGT 910

**B**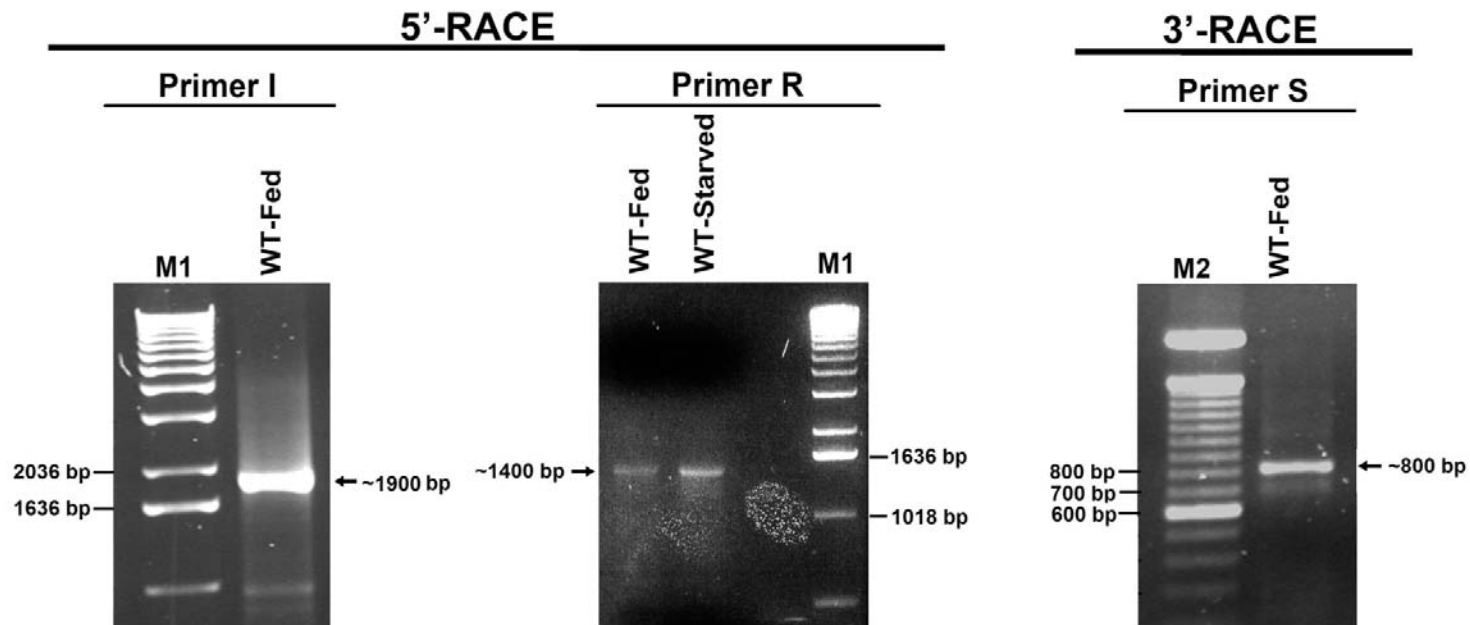

**Supplementary Figure S2. 5'- and 3'-RACE primer design and amplicon products.** (A) Location of the 5'- and 3'-mL-STL gene-specific rapid amplification of cDNA ends (RACE) primers. The sequences of 5'- and 3'-RACE primers are boxed and bolded, and the PCR amplification orientations are indicated. The arbitrary ARP1 and anchored AP8 primer sequences used for amplification of the partial mL-STL cDNA fragment in the FDD analysis are bolded and underlined. (B) 5'- and 3'-RACE mL-STL PCR products. Total RNA (5 µg/reaction) from the livers of a wild-type fed (WT-Fed) and a 72 h-starved (WT-Starved) mice was used in the RACE experiment.









Exon 6

Table with columns for genomic coordinates (811-900) and sequence alignments for various conditions (e.g., 5' #20-Starved, 5' #29-Starved, etc.).

Table with columns for genomic coordinates (901-990) and sequence alignments for various conditions (e.g., 5' #20-Starved, 5' #29-Starved, etc.).

Exon 7

Table with columns for genomic coordinates (991-1080) and sequence alignments for various conditions (e.g., 5' #20-Starved, 5' #29-Starved, etc.).

Supplementary Figure S3 (p. 4)





|               |                 |                 |                 |                 |                 |                 |       |       |       |       |       |       |      |
|---------------|-----------------|-----------------|-----------------|-----------------|-----------------|-----------------|-------|-------|-------|-------|-------|-------|------|
|               | 1891            | 1905            | 1906            | 1920            | 1921            | 1935            | 1936  | 1950  | 1951  | 1965  | 1966  | 1980  |      |
| 5'#22-Fed(I)  | AG-----         | -----           | -----           | -----           | -----           | -----           | ----- | ----- | ----- | ----- | ----- | ----- | 1643 |
| 5'#17-Fed(I)  | AG-----         | -----           | -----           | -----           | -----           | -----           | ----- | ----- | ----- | ----- | ----- | ----- | 1738 |
| 5'#37-Fed(I)  | AG-----         | -----           | -----           | -----           | -----           | -----           | ----- | ----- | ----- | ----- | ----- | ----- | 1738 |
| 5'#100-Fed(I) | AG-----         | -----           | -----           | -----           | -----           | -----           | ----- | ----- | ----- | ----- | ----- | ----- | 1740 |
| 5'#6-Fed(I)   | AG-----         | -----           | -----           | -----           | -----           | -----           | ----- | ----- | ----- | ----- | ----- | ----- | 1740 |
| 5'#69-Fed(I)  | AG-----         | -----           | -----           | -----           | -----           | -----           | ----- | ----- | ----- | ----- | ----- | ----- | 1740 |
| 5'#35-Fed(I)  | AG-----         | -----           | -----           | -----           | -----           | -----           | ----- | ----- | ----- | ----- | ----- | ----- | 1862 |
| 5'#23-Fed(I)  | AG-----         | -----           | -----           | -----           | -----           | -----           | ----- | ----- | ----- | ----- | ----- | ----- | 1866 |
| 5'#9-Fed(I)   | AG-----         | -----           | -----           | -----           | -----           | -----           | ----- | ----- | ----- | ----- | ----- | ----- | 1877 |
| Riken_v1      | AGAAAAATACTAAC  | TTATTCGTTTTGTTC | CTGTCCTTCAGTGTA | GAAGACTTCGTATT  | TTTTAAAAACAATT  | TTATTCTTTCAACG  |       |       |       |       |       |       | 1972 |
| Riken_v2      | AGAAAAATACTAAC  | TTATTCGTTTTGTTC | CTGTCCTTCAGTGTA | GAAGACTTCGTATT  | TTTTAAAAACAATT  | TTATTCTTTCAACG  |       |       |       |       |       |       | 1922 |
|               | 1981            | 1995            | 1996            | 2010            | 2011            | 2025            | 2026  | 2040  | 2041  | 2055  | 2056  | 2070  |      |
| Riken_v1      | AATTTAAAAAAAAC  | ACCTTTGGAACAACA | AGAACAACAAAAGTA | TAATTACTTCTTCTA | TTGCTTGCATTGAAG | AAATGCTTTAAAGTA |       |       |       |       |       |       | 2062 |
| Riken_v2      | AATTTAAAAAAAAC  | ACCTTTGGAACAACA | AGAACAACAAAAGTA | TAATTACTTCTTCTA | TTGCTTGCATTGAAG | AAATGCTTTAAAGTA |       |       |       |       |       |       | 2012 |
|               | 2071            | 2085            | 2086            | 2100            | 2101            | 2115            | 2116  | 2130  | 2131  | 2145  | 2146  | 2160  |      |
| Riken_v1      | TCATCATATTTAATA | TTTCTCCATCATTTC | ACTTATAATCAATAA | TGTCGGTAAACAAAA | ATTAAAAAAAACA   | ATCATGACTA----- |       |       |       |       |       |       | 2147 |
| Riken_v2      | TCATCATATTTAATA | TTTCTCCATCATTTC | ACTTATAATCAATAA | TGTCGGTAAACAAAA | ATTAAAAAAAACA   | ATCATGACTA----- |       |       |       |       |       |       | 2097 |

## Supplementary Figure S3 (p. 7)

**Supplementary Figure S3. Alignment of 28 mL-STL 5'-RACE clone nucleotide sequences.** All 5'-RACE clones showed identical nucleotide sequence except that a 95 bp fragment (boxed and shaded) was absent in two clones 5'#22-Fed(I) and 5'#12-Starved(R), suggesting the presence of alternative splicing variants. Ten (L1 – L10) different 5'-termini are indicated by downward arrows from nucleotides 1 to 169 relative to clone 5'#2-Starved(R). An extra short fragment (TTTTTCAG) was found at the end of exon 6 in clone 5'#12-Starved(R). The mismatched nucleotides are indicated by boxed nucleotides throughout the sequences.





|              |                 |                  |                  |                 |                  |                 |     |     |     |     |     |     |      |
|--------------|-----------------|------------------|------------------|-----------------|------------------|-----------------|-----|-----|-----|-----|-----|-----|------|
|              | 451             | 465              | 466              | 480             | 481              | 495             | 496 | 510 | 511 | 525 | 526 | 540 |      |
| 3'#3-Fed(S)  | ACCTTTGAAGTAGAA | AAGATGCCTGCCTGT  | TTGTGTAACAGGCTG  | GGGAA-GATTCCAAT | ACAGAGCTAATCAGA  | TTGGCCTCAGAAAAA |     |     |     |     |     |     | 518  |
| 3'#13-Fed(S) | ACCTTTGAAGTAGAA | AAGATGCCTGCCTGT  | TTGTGTAACAGGCTG  | GGGAA-GATTCCAAT | ACAGAGCTAATCAGA  | TTGGCCTCAGAAAAA |     |     |     |     |     |     | 518  |
| 3'#24-Fed(S) | ACCTTTGAAGTAGAA | AAGATGCCTGCCTGT  | TTGTGTAACAGGCTG  | GGGAA-GATTCCAAT | ACAGAGCTAATCAGA  | TTGGCCTCAGAAAAA |     |     |     |     |     |     | 518  |
| 3'#20-Fed(S) | ACCTTTGAAGTAGAA | AAGATGCCTGCCTGT  | TTGTGTAACAGGCTG  | GGGAA-GATTCCAAT | ACAGAGCTAATCAGA  | TTGGCCTCAGAAAAA |     |     |     |     |     |     | 519  |
| 3'#1-Fed(S)  | ACCTTTGAAGTAGAA | AAGATGCCTGCCTGT  | TTGTGTAACAGGCTG  | GGGAA-GATTCCAAT | ACAGAGCTAATCAGA  | TTGGCCTCAGAAAAA |     |     |     |     |     |     | 518  |
| 3'#14-Fed(S) | ACCTTTGAAGTAGAA | AAGATGCCTGCCTGT  | TTGTGTAACAGGCTG  | GGGAA-GATTCCAAT | ACAGAGCTAATCAGA  | TTGGCCTCAGAAAAA |     |     |     |     |     |     | 518  |
| 3'#21-Fed(S) | ACCTTTGAAGTAGAA | AAGATGCCTGCCTGT  | TTGTGTAACAGGCTG  | GGGAA-GATTCCAAT | ACAGAGCTAATCAGA  | TTGGCCTCAGAAAAA |     |     |     |     |     |     | 518  |
| 3'#2-Fed(S)  | ACCTTTGAAGTAGAA | AAGATGCCTGCCTGT  | TTGTGTAACAGGCTG  | GGGAA-GATTCCAAT | ACAGAGCTAATCAGA  | TTGGCCTCAGAAAAA |     |     |     |     |     |     | 518  |
| 3'#9-Fed(S)  | ACCTTTGAAGTAGAA | AAGATGCCTGCCTGT  | TTGTGTAACAGGCTG  | GGGAA-GATTCCAAT | ACAGAGCTAATCAGA  | TTGGCCTCAGAAAAA |     |     |     |     |     |     | 518  |
| 3'#16-Fed(S) | ACCTTTGAAGTAGAA | AAGATGCCTGCCTGT  | TTGTGTAACAGGCTG  | GGGAA-GATTCCAAT | ACAGAGCTAATCAGA  | TTGGCCTCAGAAAAA |     |     |     |     |     |     | 518  |
| 3'#23-Fed(S) | ACCTTTGAAGTAGAA | AAGATGCCTGCCTGT  | TTGTGTAACAGGCTG  | GGGAA-GATTCCAAT | ACAGAGCTAATCAGA  | TTGGCCTCAGAAAAA |     |     |     |     |     |     | 518  |
| 3'#25-Fed(S) | ACCTTTGAAGTAGAA | AAGATGCCTGCCTGT  | TTGTGTAACAGGCTG  | GGGAA-GATTCCAAT | ACAGAGCTAATCAGA  | TTGGCCTCAGAAAAA |     |     |     |     |     |     | 518  |
| Riken_v1     | ACCTTTGAAGTAGAA | AAGATGCCTGCCTGT  | TTGTGTAACAGGCTG  | GGGAA-GATTCCAAT | ACAGAGCTAATCAGA  | TTGGCCTCAGAAAAA |     |     |     |     |     |     | 1889 |
| Riken_v2     | ACCTTTGAAGTAGAA | AAGATGCCTGCCTGT  | TTGTGTAACAGGCTG  | GGGAA-GATTCCAAT | ACAGAGCTAATCAGA  | TTGGCCTCAGAAAAA |     |     |     |     |     |     | 1839 |
|              | 541             | 555              | 556              | 570             | 571              | 585             | 586 | 600 | 601 | 615 | 616 | 630 |      |
| 3'#3-Fed(S)  | ATACTAACTTATTCC | TTTTGTTCCTGTCTT  | TCAGTGTAGAAGACTT | CTGTATTTTTTAAA  | ATACAATTTTATTTC  | TTTCAACGAATTTAA |     |     |     |     |     |     | 608  |
| 3'#13-Fed(S) | ATACTAACTTATTCC | TTTTGTTCCTGTCTT  | TCAGTGTAGAAGACTT | CTGTATTTTTTAAA  | ATACAATTTTATTTC  | TTTCAACGAATTTAA |     |     |     |     |     |     | 608  |
| 3'#24-Fed(S) | ATACTAACTTATTCC | TTTTGTTCCTGTCTT  | TCAGTGTAGAAGACTT | CTGTATTTTTTAAA  | ATACAATTTTATTTC  | TTTCAACGAATTTAA |     |     |     |     |     |     | 608  |
| 3'#20-Fed(S) | ATACTAACTTATTCC | TTTTGTTCCTGTCTT  | TCAGTGTAGAAGACTT | CTGTATTTTTTAAA  | ATACAATTTTATTTC  | TTTCAACGAATTTAA |     |     |     |     |     |     | 609  |
| 3'#1-Fed(S)  | ATACTAACTTATTCC | TTTTGTTCCTGTCTT  | TCAGTGTAGAAGACTT | CTGTATTTTTTAAA  | ATACAATTTTATTTC  | TTTCAACGAATTTAA |     |     |     |     |     |     | 608  |
| 3'#14-Fed(S) | ATACTAACTTATTCC | TTTTGTTCCTGTCTT  | TCAGTGTAGAAGACTT | CTGTATTTTTTAAA  | ATACAATTTTATTTC  | TTTCAACGAATTTAA |     |     |     |     |     |     | 608  |
| 3'#21-Fed(S) | ATACTAACTTATTCC | TTTTGTTCCTGTCTT  | TCAGTGTAGAAGACTT | CTGTATTTTTTAAA  | ATACAATTTTATTTC  | TTTCAACGAATTTAA |     |     |     |     |     |     | 608  |
| 3'#16-Fed(S) | ATACTAACTTATTCC | TTTTGTTCCTGTCTT  | TCAGTGTAGAAGACTT | CTGTATTTTTTAAA  | ATACAATTTTATTTC  | TTTCAACGAATTTAA |     |     |     |     |     |     | 608  |
| 3'#2-Fed(S)  | ATACTAACTTATTCC | TTTTGTTCCTGTCTT  | TCAGTGTAGAAGACTT | CTGTATTTTTTAAA  | ATACAATTTTATTTC  | TTTCAACGAATTTAA |     |     |     |     |     |     | 608  |
| 3'#9-Fed(S)  | ATACTAACTTATTCC | TTTTGTTCCTGTCTT  | TCAGTGTAGAAGACTT | CTGTATTTTTTAAA  | ATACAATTTTATTTC  | TTTCAACGAATTTAA |     |     |     |     |     |     | 608  |
| 3'#16-Fed(S) | ATACTAACTTATTCC | TTTTGTTCCTGTCTT  | TCAGTGTAGAAGACTT | CTGTATTTTTTAAA  | ATACAATTTTATTTC  | TTTCAACGAATTTAA |     |     |     |     |     |     | 608  |
| 3'#23-Fed(S) | ATACTAACTTATTCC | TTTTGTTCCTGTCTT  | TCAGTGTAGAAGACTT | CTGTATTTTTTAAA  | ATACAATTTTATTTC  | TTTCAACGAATTTAA |     |     |     |     |     |     | 608  |
| 3'#25-Fed(S) | ATACTAACTTATTCC | TTTTGTTCCTGTCTT  | TCAGTGTAGAAGACTT | CTGTATTTTTTAAA  | ATACAATTTTATTTC  | TTTCAACGAATTTAA |     |     |     |     |     |     | 608  |
| Riken_v1     | ATACTAACTTATTCC | TTTTGTTCCTGTCTT  | TCAGTGTAGAAGACTT | CTGTATTTTTTAAA  | ATACAATTTTATTTC  | TTTCAACGAATTTAA |     |     |     |     |     |     | 1979 |
| Riken_v2     | ATACTAACTTATTCC | TTTTGTTCCTGTCTT  | TCAGTGTAGAAGACTT | CTGTATTTTTTAAA  | ATACAATTTTATTTC  | TTTCAACGAATTTAA |     |     |     |     |     |     | 1929 |
|              | 631             | 645              | 646              | 660             | 661              | 675             | 676 | 690 | 691 | 705 | 706 | 720 |      |
| 3'#3-Fed(S)  | AAAAAA-CACCTTTG | GAACAACAAGAACAA  | CAAAAGTATAAATTAC | TTCTTCTATTGCTTG | CATTGAAGAAATGCT  | TTAAAGTATCATCAT |     |     |     |     |     |     | 697  |
| 3'#13-Fed(S) | AAAAAA-CACCTTTG | GAACAACAAGAACAA  | CAAAAGTATAAATTAC | TTCTTCTATTGCTTG | CATTGAAGAAATGCT  | TTAAAGTATCATCAT |     |     |     |     |     |     | 697  |
| 3'#24-Fed(S) | AAAAAA-CACCTTTG | GAACAACAAGAACAA  | CAAAAGTATAAATTAC | TTCTTCTATTGCTTG | CATTGAAGAAATGCT  | TTAAAGTATCATCAT |     |     |     |     |     |     | 697  |
| 3'#20-Fed(S) | AAAAAA-CACCTTTG | GAACAACAAGAACAA  | CAAAAGTATAAATTAC | TTCTTCTATTGCTTG | CATTGAAGAAATGCT  | TTAAAGTATCATCAT |     |     |     |     |     |     | 698  |
| 3'#1-Fed(S)  | AAAAAA-CACCTTTG | GAACAACAAGAACAA  | CAAAAGTATAAATTAC | TTCTTCTATTGCTTG | CATTGAAGAAATGCT  | TTAAAGTATCATCAT |     |     |     |     |     |     | 697  |
| 3'#14-Fed(S) | AAAAAA-CACCTTTG | GAACAACAAGAACAA  | CAAAAGTATAAATTAC | TTCTTCTATTGCTTG | CATTGAAGAAATGCT  | TTAAAGTATCATCAT |     |     |     |     |     |     | 697  |
| 3'#21-Fed(S) | AAAAAA-CACCTTTG | GAACAACAAGAACAA  | CAAAAGTATAAATTAC | TTCTTCTATTGCTTG | CATTGAAGAAATGCT  | TTAAAGTATCATCAT |     |     |     |     |     |     | 697  |
| 3'#16-Fed(S) | AAAAAA-CACCTTTG | GAACAACAAGAACAA  | CAAAAGTATAAATTAC | TTCTTCTATTGCTTG | CATTGAAGAAATGCT  | TTAAAGTATCATCAT |     |     |     |     |     |     | 697  |
| 3'#2-Fed(S)  | AAAAAA-CACCTTTG | GAACAACAAGAACAA  | CAAAAGTATAAATTAC | TTCTTCTATTGCTTG | CATTGAAGAAATGCT  | TTAAAGTATCATCAT |     |     |     |     |     |     | 697  |
| 3'#9-Fed(S)  | AAAAAA-CACCTTTG | GAACAACAAGAACAA  | CAAAAGTATAAATTAC | TTCTTCTATTGCTTG | CATTGAAGAAATGCT  | TTAAAGTATCATCAT |     |     |     |     |     |     | 697  |
| 3'#16-Fed(S) | AAAAAA-CACCTTTG | GAACAACAAGAACAA  | CAAAAGTATAAATTAC | TTCTTCTATTGCTTG | CATTGAAGAAATGCT  | TTAAAGTATCATCAT |     |     |     |     |     |     | 697  |
| 3'#23-Fed(S) | AAAAAA-CACCTTTG | GAACAACAAGAACAA  | CAAAAGTATAAATTAC | TTCTTCTATTGCTTG | CATTGAAGAAATGCT  | TTAAAGTATCATCAT |     |     |     |     |     |     | 697  |
| 3'#25-Fed(S) | AAAAAA-CACCTTTG | GAACAACAAGAACAA  | CAAAAGTATAAATTAC | TTCTTCTATTGCTTG | CATTGAAGAAATGCT  | TTAAAGTATCATCAT |     |     |     |     |     |     | 697  |
| Riken_v1     | AAAAAA-CACCTTTG | GAACAACAAGAACAA  | CAAAAGTATAAATTAC | TTCTTCTATTGCTTG | CATTGAAGAAATGCT  | TTAAAGTATCATCAT |     |     |     |     |     |     | 2069 |
| Riken_v2     | AAAAAA-CACCTTTG | GAACAACAAGAACAA  | CAAAAGTATAAATTAC | TTCTTCTATTGCTTG | CATTGAAGAAATGCT  | TTAAAGTATCATCAT |     |     |     |     |     |     | 2019 |
|              | 721             | 735              | 736              | 750             | 751              | 765             | 766 | 780 | 781 | 795 | 796 | 810 |      |
|              |                 |                  |                  |                 |                  |                 |     | PAS |     |     |     |     |      |
| 3'#3-Fed(S)  | ATTTAATATTTCTCC | ATCATTTCACCTTATA | ATCAATAATGTCGGT  | AAACAAAAATTAAAA | AAAAAA-CAATCATGA | --AAAAAA        |     |     |     |     |     |     | 785  |
| 3'#13-Fed(S) | ATTTAATATTTCTCC | ATCATTTCACCTTATA | ATCAATAATGTCGGT  | AAACAAAAATTAAAA | AAAAAA-CAATCATGA | --AAAAAA        |     |     |     |     |     |     | 784  |
| 3'#24-Fed(S) | ATTTAATATTTCTCC | ATCATTTCACCTTATA | ATCAATAATGTCGGT  | AAACAAAAATTAAAA | AAAAAA-CAATCATGA | --AAAAAA        |     |     |     |     |     |     | 785  |
| 3'#20-Fed(S) | ATTTAATATTTCTCC | ATCATTTCACCTTATA | ATCAATAATGTCGGT  | AAACAAAAATTAAAA | AAAAAA-CAATCATGA | C-AAAAAA        |     |     |     |     |     |     | 787  |
| 3'#1-Fed(S)  | ATTTAATATTTCTCC | ATCATTTCACCTTATA | ATCAATAATGTCGGT  | AAACAAAAATTAAAA | AAAAAA-CAATCATGA | --AAAAAA        |     |     |     |     |     |     | 782  |
| 3'#14-Fed(S) | ATTTAATATTTCTCC | ATCATTTCACCTTATA | ATCAATAATGTCGGT  | AAACAAAAATTAAAA | AAAAAA-CAATCATGA | --AAAAAA        |     |     |     |     |     |     | 784  |
| 3'#21-Fed(S) | ATTTAATATTTCTCC | ATCATTTCACCTTATA | ATCAATAATGTCGGT  | AAACAAAAATTAAAA | AAAAAA-CAATCATGA | --AAAAAA        |     |     |     |     |     |     | 785  |
| 3'#2-Fed(S)  | ATTTAATATTTCTCC | ATCATTTCACCTTATA | ATCAATAATGTCGGT  | AAACAAAAATTAAAA | AAAAAA-CAATCATGA | CTAAAAAA        |     |     |     |     |     |     | 787  |
| 3'#9-Fed(S)  | ATTTAATATTTCTCC | ATCATTTCACCTTATA | ATCAATAATGTCGGT  | AAACAAAAATTAAAA | AAAAAA-CAATCATGA | CTAAAAAA        |     |     |     |     |     |     | 787  |
| 3'#16-Fed(S) | ATTTAATATTTCTCC | ATCATTTCACCTTATA | ATCAATAATGTCGGT  | AAACAAAAATTAAAA | AAAAAA-CAATCATGA | --AAAAAA        |     |     |     |     |     |     | 785  |
| 3'#23-Fed(S) | ATTTAATATTTCTCC | ATCATTTCACCTTATA | ATCAATAATGTCGGT  | AAACAAAAATTAAAA | AAAAAA-CAATCATGA | --AAAAAA        |     |     |     |     |     |     | 785  |
| 3'#25-Fed(S) | ATTTAATATTTCTCC | ATCATTTCACCTTATA | ATCAATAATGTCGGT  | AAACAAAAATTAAAA | AAAAAA-CAATCATGA | --AAAAAA        |     |     |     |     |     |     | 785  |
| Riken_v1     | ATTTAATATTTCTCC | ATCATTTCACCTTATA | ATCAATAATGTCGGT  | AAACAAAAATTAAAA | AAAAAA-CAATCATGA | CTA-----        |     |     |     |     |     |     | 2147 |
| Riken_v2     | ATTTAATATTTCTCC | ATCATTTCACCTTATA | ATCAATAATGTCGGT  | AAACAAAAATTAAAA | AAAAAA-CAATCATGA | CTA-----        |     |     |     |     |     |     | 2097 |
|              |                 |                  |                  |                 |                  |                 |     |     |     | ▲   | ▲   | ▲   |      |
|              |                 |                  |                  |                 |                  |                 |     |     |     | 1   | 8   | 12  |      |
|              | 811             | 825              | 826              | 840             | 841              | 855             | 856 | 870 | 871 | 885 | 886 | 900 |      |
| 3'#3-Fed(S)  | AAA-----        |                  | 788              |                 |                  |                 |     |     |     |     |     |     |      |
| 3'#13-Fed(S) | AA-----         |                  | 786              |                 |                  |                 |     |     |     |     |     |     |      |
| 3'#24-Fed(S) | AAA-----        |                  | 788              |                 |                  |                 |     |     |     |     |     |     |      |
| 3'#20-Fed(S) | AAAAAAA-----    |                  | 796              |                 |                  |                 |     |     |     |     |     |     |      |
| 3'#1-Fed(S)  | AAAAA-----      |                  | 787              |                 |                  |                 |     |     |     |     |     |     |      |
| 3'#14-Fed(S) | AA-----         |                  | 786              |                 |                  |                 |     |     |     |     |     |     |      |
| 3'#21-Fed(S) | AAAAAAA-----    |                  | 792              |                 |                  |                 |     |     |     |     |     |     |      |
| 3'#2-Fed(S)  | AAA-----        |                  | 790              |                 |                  |                 |     |     |     |     |     |     |      |
| 3'#9-Fed(S)  | AAAAAAA-----    |                  | 797              |                 |                  |                 |     |     |     |     |     |     |      |
| 3'#16-Fed(S) | AAAAAAA-----    |                  | 797              |                 |                  |                 |     |     |     |     |     |     |      |
| 3'#23-Fed(S) | AAAAA-----      |                  | 791              |                 |                  |                 |     |     |     |     |     |     |      |
| 3'#25-Fed(S) | AAAA-----       |                  | 789              |                 |                  |                 |     |     |     |     |     |     |      |

## Supplementary Figure S4 (p. 2)

**Supplementary Figure S4. Alignment of 12 mL-STL 3'-RACE clone nucleotide sequences.** All 3'-RACE clones showed identical nucleotide sequence except the presence of some mismatched nucleotides as indicated by boxed nucleotides throughout the sequences. The longest 3'-RACE cDNA was 797 bp and found in clones 3'#9-Fed(S) and 3'#16-Fed(S), while the shortest 786 bp in clones 3'#13-Fed(S) and 3'#14-Fed(S). The solid triangles show the four different polyadenylation cleavage site (PACS) variants. The polyadenylation signal (PAS) ATTAAA is double-underlined.

|         |                                          |     |
|---------|------------------------------------------|-----|
| mL-STL2 | MTDEFLWIEGIPFPTVYYSQEIIREVRDRF           | 30  |
| mL-STL1 | MTDEFLWIEGIPFPTVYYSQEIIREVRDRF           | 30  |
| mL-STL2 | VVRDEDTIIIVT <b>YPKSGTHW</b> LNEIVCLILTK | 60  |
| mL-STL1 | VVRDEDTIIIVT <b>YPKSGTHW</b> LNEIVCLILTK | 60  |
|         | N-terminal/5'-PSB motif                  |     |
| mL-STL2 | GDPTWVQSTIANERTPWIEFENNYRILNSK           | 90  |
| mL-STL1 | GDPTWVQSTIANERTPWIEFENNYRILNSK           | 90  |
| mL-STL2 | EGPRLMASLLPIQLFPKSF <b>FSSKA</b> KVIYLI  | 120 |
| mL-STL1 | EGPRLMASLLPIQLFPKSF <b>FSSKA</b> KVIYLI  | 120 |
|         | FSSKA motif                              |     |
| mL-STL2 | <b>RNPRDVLVSGY</b> HYFNALKQGKEQVPWKIYF   | 150 |
| mL-STL1 | <b>RNPRDVLVSGY</b> HYFNALKQGKEQVPWKIYF   | 150 |
|         | 3'-PB motif                              |     |
| mL-STL2 | ENFLQGK-----                             | 157 |
| mL-STL1 | ENFLQGKSYFGSWFEHACGWISLRKRENIL           | 180 |
| mL-STL2 | -----                                    | 157 |
| mL-STL1 | VLSYEQLKKDTRNTIKKICEFLGENLESGE           | 210 |
| mL-STL2 | -----                                    | 157 |
| mL-STL1 | LELVLKNISFQIMKERMISQSCLSNIEKHE           | 240 |
| mL-STL2 | -----                                    | 157 |
| mL-STL1 | FIM <b>RKGITGDWKNHFT</b> VAQAEAFDKAFQEK  | 270 |
|         | C-terminal/3'-PSB motif                  |     |
| mL-STL2 | -----                                    | 157 |
| mL-STL1 | AADFPQELFSWE                             | 282 |

**Supplementary Figure S5. Comparison of mL-STL1 and mL-STL2 amino acid sequences.** The amino acid residues of mL-STL1 and mL-STL2 are 282 and 157, respectively. The N-terminal conserved sequence [N-terminal/5'-phosphosulfate binding (PSB) motif], SULT2 FSSKA signature motif sequence (FSSKA motif), 3'-phosphate binding (PB) motif, and C-terminal conserved sequence (C-terminal/3'-PSB motif) are boxed. The C-terminal/3'-PSB motif is missing in the mL-STL2 isoform.

**A**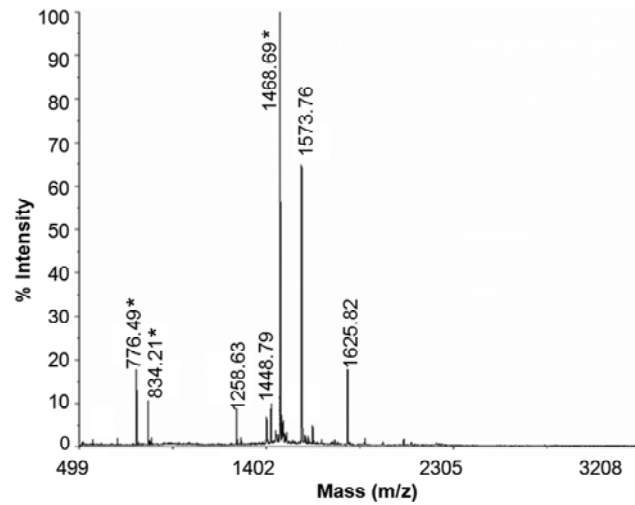**B**

| Protein name                     | GenBank accession no. | Position in amino acid sequences | Peptide sequences  | Observed mass (m/z) | Experimental mass (m/z) | Calculated mass (m/z) | Delta mass (Da) | Mascot score | Matched peptides | Sequence coverage (%) |
|----------------------------------|-----------------------|----------------------------------|--------------------|---------------------|-------------------------|-----------------------|-----------------|--------------|------------------|-----------------------|
| Sulfo-transferase-like protein 1 | NP_780459             | 30 – 33                          | FVVR               | 520.32              | 519.31                  | 519.32                | -0.01           | 593          | 10/23            | 34                    |
|                                  |                       | 116 – 121                        | <u>VIYLIR</u>      | 776.49              | 775.48                  | 775.50                | -0.01           |              |                  |                       |
|                                  |                       | 142 – 147                        | EQVPWK             | 786.42              | 785.41                  | 785.41                | 0.01            |              |                  |                       |
|                                  |                       | 239 – 244                        | <u>HEFIMR</u>      | 832.41              | 831.40                  | 831.41                | -0.01           |              |                  |                       |
|                                  |                       | 148 – 157                        | IYFENFLQ GK        | 1258.63             | 1257.63                 | 1257.64               | -0.01           |              |                  |                       |
|                                  |                       | 177 – 188                        | ENILVLSYEQLK       | 1448.80             | 1447.79                 | 1447.79               | -0.01           |              |                  |                       |
|                                  |                       | 75 – 85                          | <u>TPWIEFENNYR</u> | 1468.69             | 1467.68                 | 1467.68               | 0.00            |              |                  |                       |
|                                  |                       | 253 – 265                        | NHFTVAQAEAFDK      | 1477.69             | 1476.68                 | 1476.70               | -0.02           |              |                  |                       |
|                                  |                       | 61 – 74                          | GDPTWVQSTIANER     | 1573.76             | 1572.76                 | 1572.75               | 0.00            |              |                  |                       |
|                                  |                       | 125 – 138                        | DVLVSGYHYFNALK     | 1625.82             | 1624.82                 | 1624.82               | -0.01           |              |                  |                       |

**C**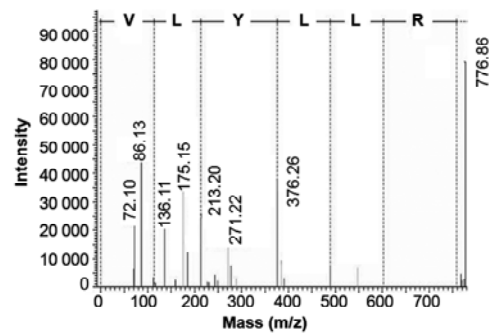**D**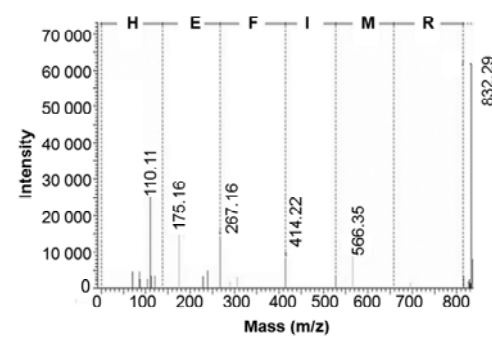**E**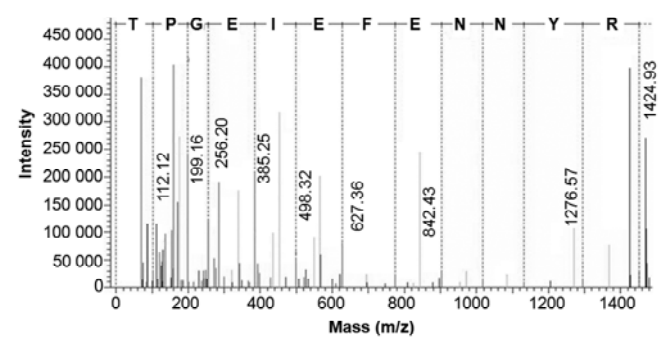

**Supplementary Figure S6. Mass spectrum of tryptic-digested recombinant mL-STL protein.** The protein band corresponding to the expected recombinant mL-STL protein was excised from the 14% SDS-PAGE, digested with trypsin, and analyzed by MALDI-TOF peptide sequencing. The tryptic peptides of the excised protein bands were submitted for searching in NCBI database ([http://www.matrixscience.com/search\\_form\\_select.html](http://www.matrixscience.com/search_form_select.html)). The peptides that matched with the theoretical predicted peptides of the mouse liver sulfotransferase-like protein 1 (NP\_780459) are shown in the MS spectrum in (A) and summarized in a table in (B). The peptides that are indicated with an asterisk (\*) in (A) or underlined in (B) were analyzed by MS/MS sequencing. The MS/MS spectra of doubly charged peptides at mass-to-charge (m/z) ratio of 776.49 (C), 834.21 (D), and 1468.69 (E) were sequenced as VLYLLR, HEFIMR, and TPGEIEFENNYR, respectively.

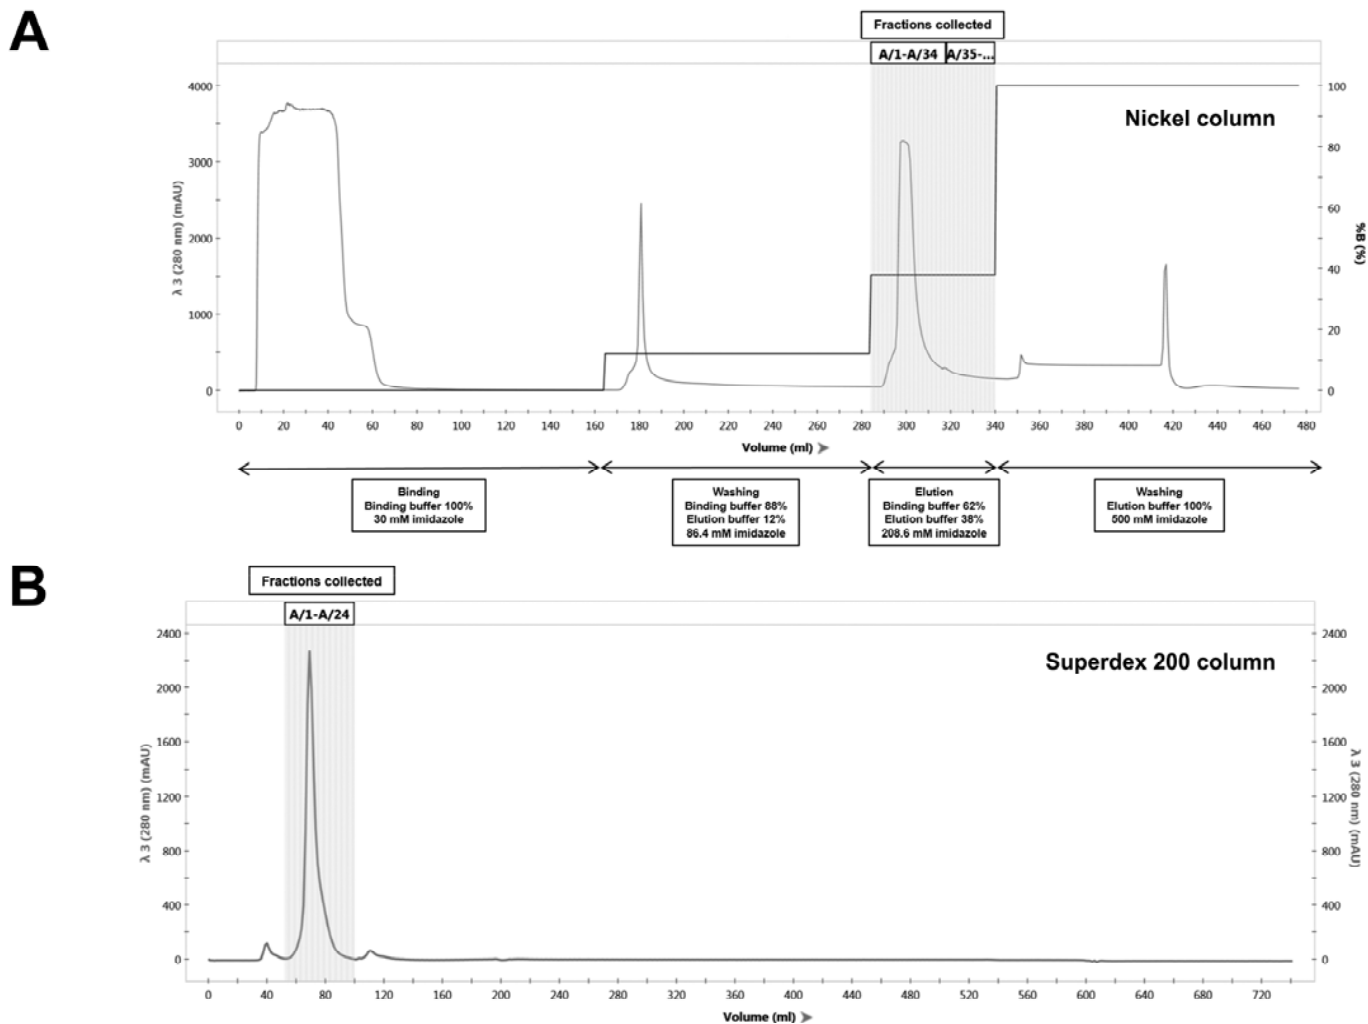

**Supplementary Figure S7. Purification of recombinant His-mL-STL protein.** A two-step column chromatographic method using a Bio-Rad NGC™ Discover 10 chromatography system was used. (A) The supernatant collected from crude cell lysate was subject to two 5-ml nickel affinity HiTrap columns coupled in series. The columns were charged with nickel ion and pre-equilibrated with a binding buffer (50 mM Tris-HCl, pH 8, 500 mM NaCl, and 30 mM imidazole). The samples were then loaded onto the column and 170 ml of binding buffer was passed through the column at a flow rate of 4 ml/min to remove unbound proteins. Then the column was washed with 120 ml of 86.4 mM imidazole in a mixed binding and elution buffer (50 mM Tris-HCl, pH 8, 500 mM NaCl, and 500 mM imidazole) to remove non-specific protein binding. The bound His-mL-STL proteins were eluted from the column with 28 ml of 208.6 mM imidazole in elution buffer. (B) The eluents containing the His-mL-STL proteins were pooled, concentrated to 3 ml and then loaded, at a flow rate of 1 ml/min, onto a HiLoad Superdex 200 prep grade size exclusion column pre-equilibrated with a size-exclusion buffer (50 mM Tris-HCl, pH 8, and 150 mM NaCl). The His-mL-STL proteins were eluted with 100 ml of the same buffer and the eluted fractions containing the His-mL-STL proteins were pooled and collected for sulfotransferase activity assays.

**A**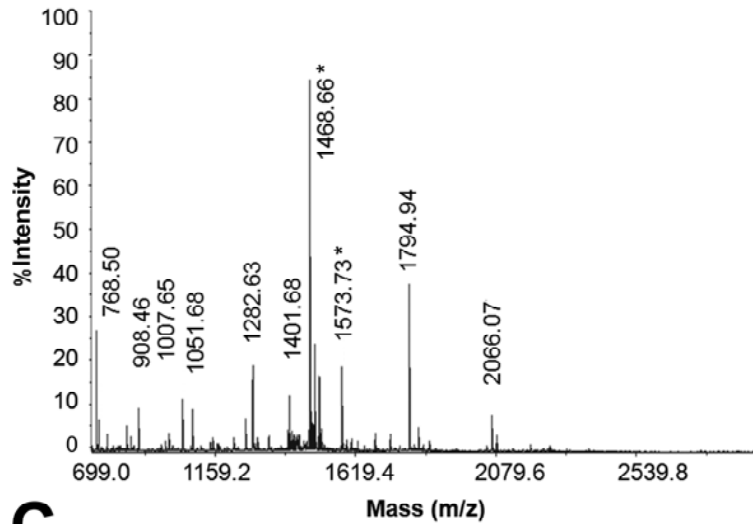**B**

| Protein name                     | GenBank accession no. | Position in amino acid sequences | Peptide sequences      | Observed mass (m/z) | Experimental mass (m/z) | Calculated mass (m/z) | Delta mass (Da) | Mascot score | Matched peptides | Sequence coverage (%) |
|----------------------------------|-----------------------|----------------------------------|------------------------|---------------------|-------------------------|-----------------------|-----------------|--------------|------------------|-----------------------|
| Sulfo-transferase-like protein 1 | NP_780459             | 30 - 44                          | <u>FVVRDEDTIIVTYPK</u> | 1794.94             | 1793.93                 | 1793.96               | -0.03           |              |                  |                       |
|                                  |                       | 61 - 74                          | <u>GDPTWVQSTIANER</u>  | 1573.73             | 1572.72                 | 1572.75               | -0.03           |              |                  |                       |
|                                  |                       | 75 - 85                          | TPWIEFENNYR            | 1468.66             | 1467.65                 | 1467.68               | -0.03           |              |                  |                       |
|                                  |                       | 95 - 107                         | LMASLLPIQLFPK          | 1486.84             | 1485.83                 | 1485.86               | -0.03           |              |                  |                       |
|                                  |                       | 116 - 121                        | VIYLIR                 | 776.48              | 775.47                  | 775.50                | -0.03           |              |                  |                       |
|                                  |                       | 116 - 124                        | VIYLIRNPR              | 1143.67             | 1142.66                 | 1142.69               | -0.03           |              |                  |                       |
|                                  |                       | 125 - 138                        | DVLVSGYHYFNALK         | 1625.81             | 1624.80                 | 1624.82               | -0.03           |              |                  |                       |
|                                  |                       | 148 - 157                        | IYFENFLQGK             | 1258.61             | 1257.61                 | 1257.64               | -0.04           |              |                  |                       |
|                                  |                       | 177 - 188                        | ENILVLSYEQLK           | 1448.79             | 1447.80                 | 1447.79               | -0.01           | 283          | 17               | 57                    |
|                                  |                       | 198 - 216                        | ICEFLGENLESGELELVLK    | 2192.09             | 2191.10                 | 2191.11               | -0.02           |              |                  |                       |
|                                  |                       | 217 - 224                        | NISFQIMK               | 996.49              | 995.48                  | 995.51                | -0.03           |              |                  |                       |
|                                  |                       | 217 - 226                        | NISFQIMKER             | 1281.62             | 1280.63                 | 1280.65               | -0.03           |              |                  |                       |
|                                  |                       | 227 - 238                        | MISQSCLSNIEK           | 1409.61             | 1408.60                 | 1408.67               | -0.07           |              |                  |                       |
|                                  |                       | 227 - 244                        | MISQSCLSNIEKHEFIMR     | 2255.06             | 2254.05                 | 2254.05               | -0.00           |              |                  |                       |
|                                  |                       | 239 - 244                        | HEFIMR                 | 848.37              | 847.37                  | 847.40                | -0.03           |              |                  |                       |
|                                  |                       | 253 - 265                        | NHFTVAQAEAFDK          | 1477.68             | 1476.67                 | 1476.70               | -0.03           |              |                  |                       |
| 253 - 270                        | NHFTVAQAEAFDKAFQEK    | 2080.98                          | 2079.98                | 2080.00             | -0.02                   |                       |                 |              |                  |                       |

Peptides sequenced by tandem mass spectrometry are underlined.

**C**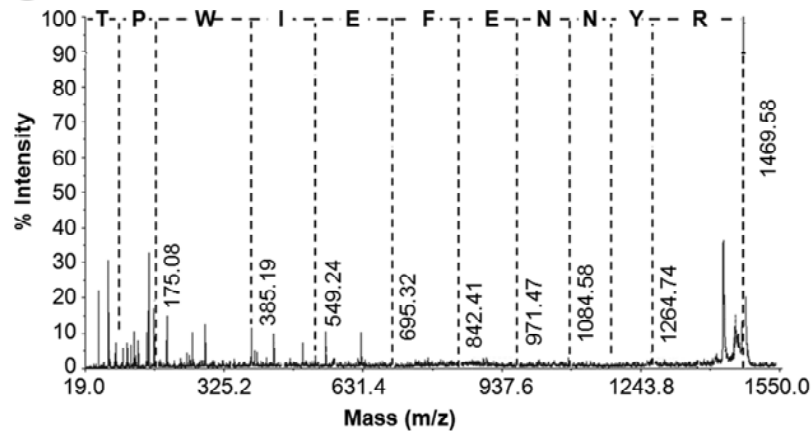**D**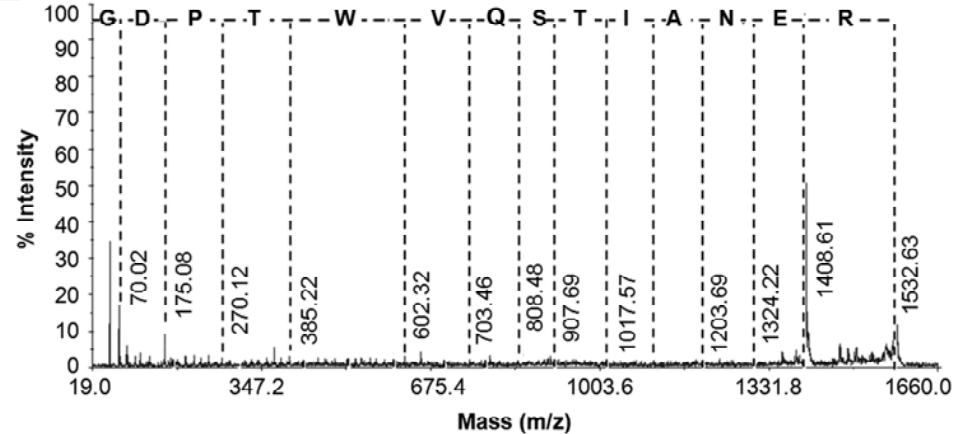

**Supplementary Figure S8. Mass spectrum of trypsin-digested recombinant His-mL-STL protein.** The protein band corresponding to the expected recombinant His-mL-STL protein was excised from the 14% SDS-PAGE, digested with trypsin, and analyzed by MALDI-TOF peptide sequencing. The tryptic peptides of the excised protein bands were submitted for searching in NCBI database ([http://www.matrixscience.com/search\\_form\\_select.html](http://www.matrixscience.com/search_form_select.html)). The peptides that matched with the theoretical predicted peptides of the mouse liver sulfotransferase-like protein 1 (NP\_780459) are shown in the MS spectrum in (A) and summarized in a table in (B). The peptides that are indicated with an asterisk (\*) in (A) or underlined in (B) were analyzed by MS/MS sequencing. The MS/MS spectra of doubly charged peptides at mass-to-charge (m/z) ratio of 1468.66 (C) and 1573.73 (D) were sequenced as TPWIEFENNYR and GDPTWVQSTIANER, respectively.
